# Supplementary material for: Site-exposed Ti3C2 MXene anchored in N-defect g-C3N4 heterostructure nanosheets for efficient photocatalytic N2 fixation
Source: Royal Society of Chemistry journal article supplement (doi:10.1039/d0cy01955k), 2020-11-24
Supplement: d0cy01955k1.pdf [file d0cy01955k1.pdf]

## Electronic Supplementary Information

### **Sites-exposed $\text{Ti}_3\text{C}_2$ MXene anchored in N-defect g- $\text{C}_3\text{N}_4$ heterostructure nanosheets for efficient photocatalytic $\text{N}_2$ fixation**

*Cong Sun, Zhiqiang Chen, Jian Cui, Kang Li, Hongxia Qu\*, Huifang Xie, Qin Zhong*

School of Chemical Engineering, Nanjing University of Science and Technology, Nanjing,  
Jiangsu 210094, PR China.

Corresponding authors: E-mail: qhx@mail.njust.edu.cn; Tel: +86-2584315517; fax: +86-  
2584315517

## Preparation of $\text{Ti}_3\text{C}_2$ nanosheets

**Preparation of  $\text{Ti}_3\text{C}_2$ :**  $\text{Ti}_3\text{AlC}_2$  powders (particle size  $< 75 \mu\text{m}$ , i.e., 200 mesh; purity  $> 98$  wt %) were purchased from Nanjing Mission new Materials Co. Ltd. Through selective etching of Al layer from  $\text{Ti}_3\text{AlC}_2$ , stacked  $\text{Ti}_3\text{C}_2$  powder can be obtained. Typically,  $\text{Ti}_3\text{AlC}_2$  powders was immersed in 50 wt % HF solution (Aladdin Bio-Chem Technology Co, LTD.) with a weight ratio of 1 g  $\text{Ti}_3\text{AlC}_2$  per 15 mL HF solution for 24 h with magnetically stirring at room temperature. The resulting suspension was washed by deionized water for three times and centrifuged to remove the impurities until the pH of the supernatant reached 6-7. The obtained  $\text{Ti}_3\text{C}_2$  powders were dried at vacuum oven for 6 h.

**Exfoliation of  $\text{Ti}_3\text{C}_2$ :** The stacked  $\text{Ti}_3\text{C}_2$  powders were exfoliated to obtain ultrathin nanosheets. Dimethyl sulfoxide (DMSO, Aladdin Bio-Chem Technology Co, LTD) was selected to enhance the delamination process. In this case, 1 g of Multilayer  $\text{Ti}_3\text{C}_2$  was added into 15 ml DMSO with magnetically stirring for 24 h at room temperature. The mixture was centrifuged (4200 rpm, 10 minutes) to obtain the intercalated Multilayer  $\text{Ti}_3\text{C}_2$  powders. And then the intercalated powders were washed by deionized water for three times to remove the residue DMSO. After that, the residue was dispersed in deaerated water in a weight ratio of 10:1 ( $\text{Ti}_3\text{C}_2$  to water). Afterward, in order to exfoliate the  $\text{Ti}_3\text{C}_2$  into 2D nanosheets, sonication was carried out in flowing  $\text{N}_2$  for 8 hours, and then the suspension was centrifuged with 10000 rpm for 10 min to remove the unexfoliated  $\text{Ti}_3\text{C}_2$ , and the supernatant contains the  $\text{Ti}_3\text{C}_2$  nanosheets ( $1 \text{ mg ml}^{-1}$ ).

## Preparation of bulk g- $\text{C}_3\text{N}_4$

**Synthesis of bulk g- $\text{C}_3\text{N}_4$ :** g- $\text{C}_3\text{N}_4$  was prepared by melamine pyrolysis according to a standard literature method. Briefly, 3 g of melamine was calcined at  $550 \text{ }^\circ\text{C}$  in a muffle furnace for 4 h using a heating rate of  $2 \text{ }^\circ\text{C}/\text{min}$ .

## **The detection of ammonia nitrogen**

The concentration of produced ammonia was detected through the colorimetric method using Nessler's reagent (determined by absorbance at 425 nm). In a typical procedure, 2ml of the reaction solution after centrifuging at 4200 rpm for 10 min was transferred into a 20 ml colorimeter tube and diluted with DI water to 5 mL, Then, 100  $\mu$ L of the potassium sodium tartrate solution was added to the sample tube. After adequate blending, 150  $\mu$ L of Nessler's reagent was added and mixed for ageing 10 min, (the same ratio and method when drawing the standard curve), and then measured by the UV-vis spectrometer. The average of the detected absorbance for three times was the absorbance of the produced ammonia. Fig. S22 shows ammonia nitrogen standard curve for calculating the ammonia concentration from the absorbance.

## **Photocatalytic H<sub>2</sub> evolution.**

Photocatalytic H<sub>2</sub> evolution was taken out in a glass-closed gas circulation system (Beijing Perfectlight Technology Co., Ltd.) with an external-irradiation pyrex glass reaction cell (Fig. S1a). The reaction temperature was precisely controlled at 279 K by circulation of cooling water. 50 mg photocatalysts were directly added into the mixed solution of 40 mL deionized water and 10 mL methanol. A 300 W Xe-lamp with a UV-cut filter (> 420 nm) was used as visible light source, the irradiation area was 30.2 cm<sup>2</sup>. Prior to testing, the reactor was completely evacuated at least for 30 min to remove air. The gas product was analyzed every 20 min by an on-line gas chromatograph (GC7806, TCD, molecular sieve 5 Å, Ar carrier).The Photocatalytic H<sub>2</sub> evolution under N<sub>2</sub> atmosphere was carried out through bubbling N<sub>2</sub> for 30min after accomplishing evacuating.

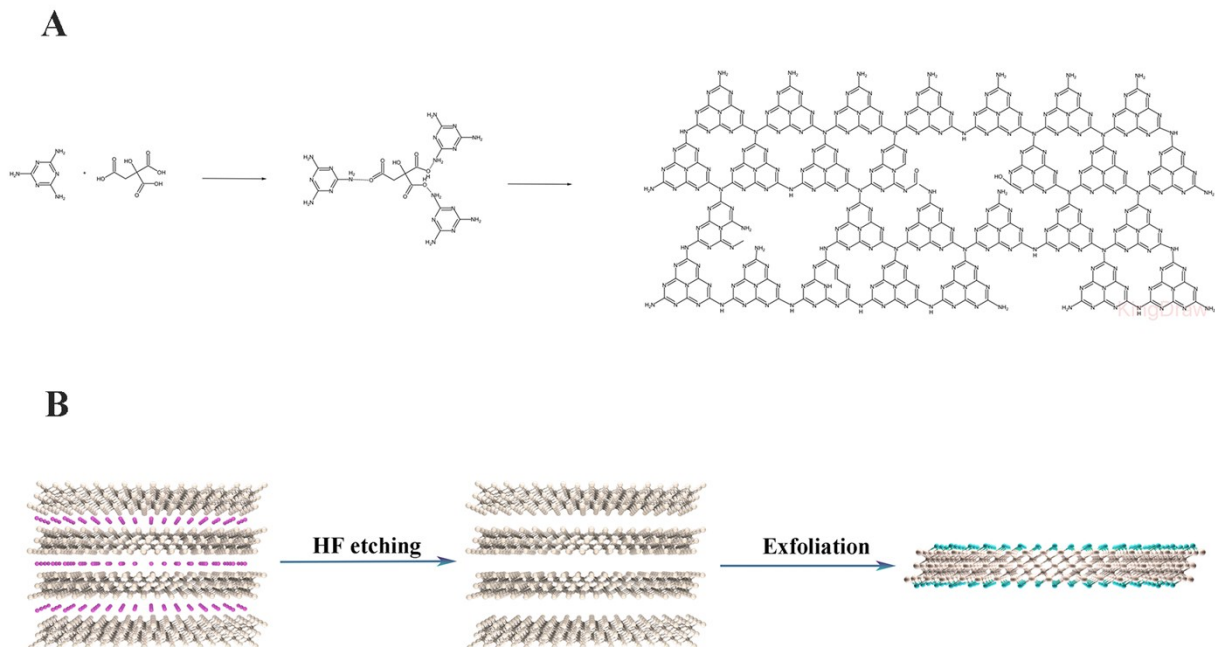

**Fig. S1** Schematic illustration of the preparation process for (A) CN and (B)  $\text{Ti}_3\text{C}_2$  nanosheets.

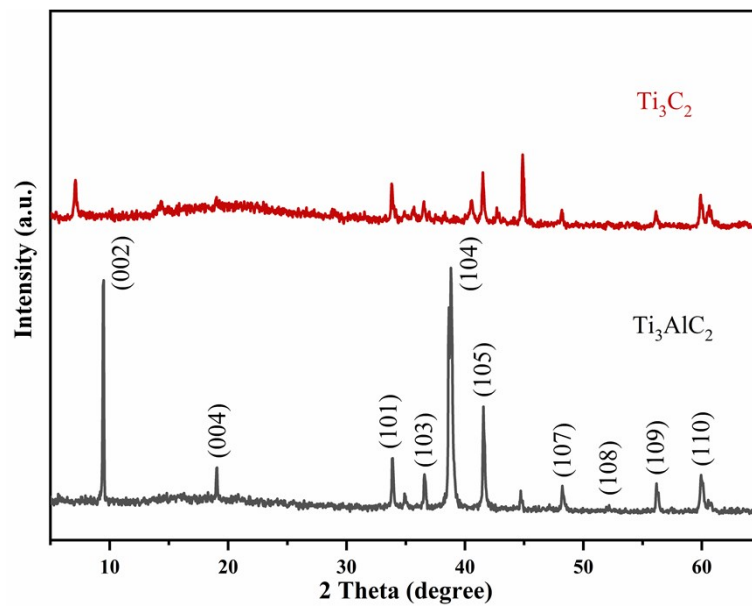

**Fig. S2** The XRD patterns of  $\text{Ti}_3\text{AlC}_2$  and  $\text{Ti}_3\text{C}_2$

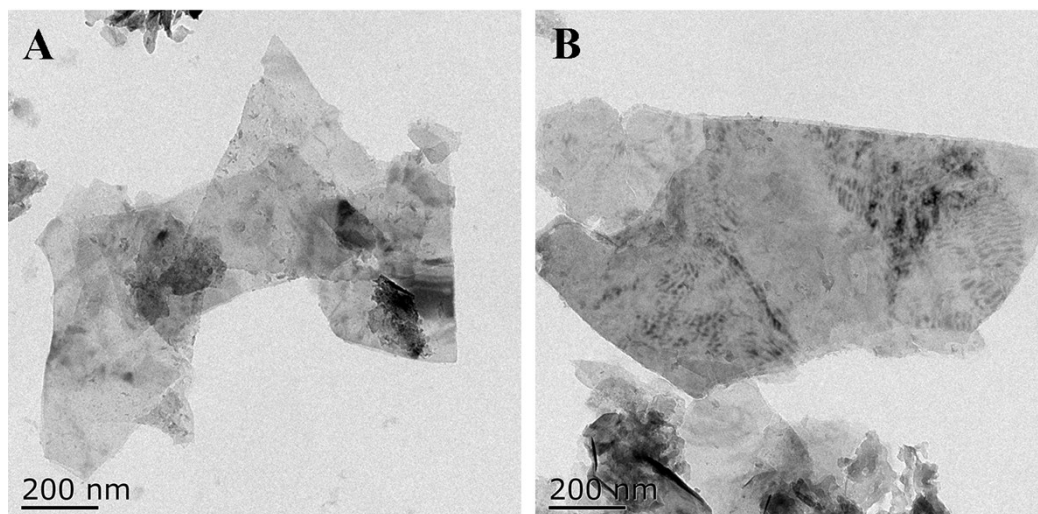

**Fig. S3** TEM images of  $\text{Ti}_3\text{C}_2$ .

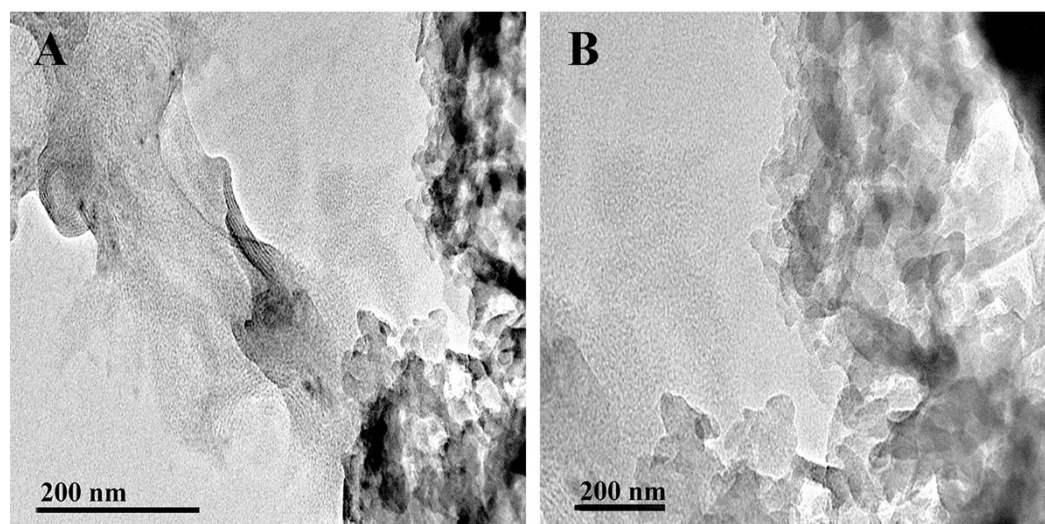

**Fig. S4** TEM images of  $\text{g-C}_3\text{N}_4$ .

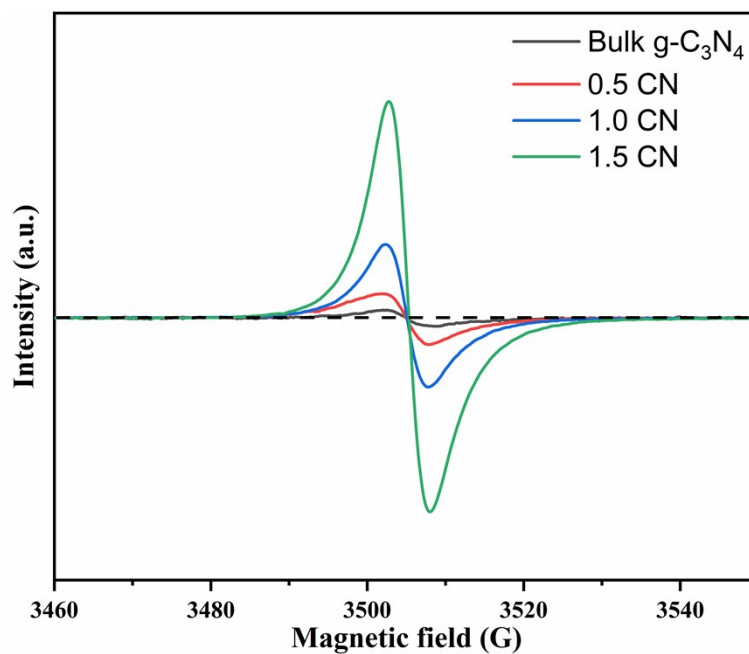

**Fig. S5** EPR spectra of bulk g-C<sub>3</sub>N<sub>4</sub> and CN.

The 0.5, 1.0 and 1.5 CN was prepared according to the experimental section 2.1 with different citric acid mass of 0.095, 0.190 and 0.285 g per 3 g melamine. The EPR signals for all samples correspond to the same type of unpaired electrons trapped by N-defects. It is evident that citric acid-assist thermal polymerization can induce abundant N-defects in bulk g-C<sub>3</sub>N<sub>4</sub>, and the concentration of N-defect is positively correlated with the content of citric acid.

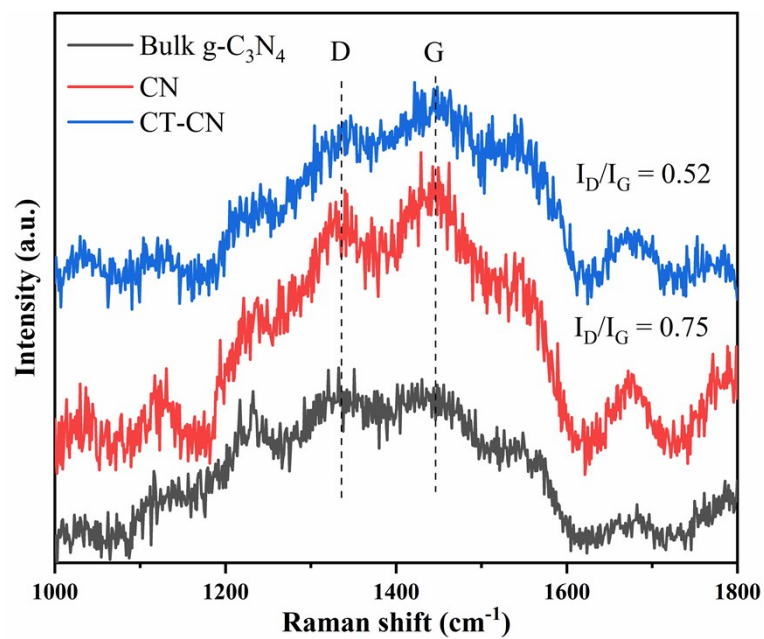

Fig. S6 Raman spectra of bulk  $g\text{-C}_3\text{N}_4$ , CN and CT-CN.

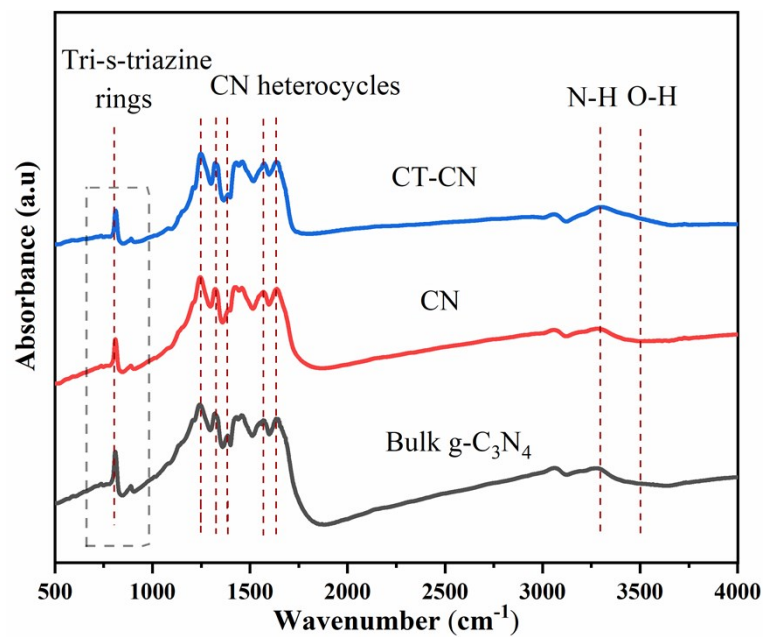

Fig. S7 FT-IR spectra of bulk  $g\text{-C}_3\text{N}_4$ , CN and CT-CN.

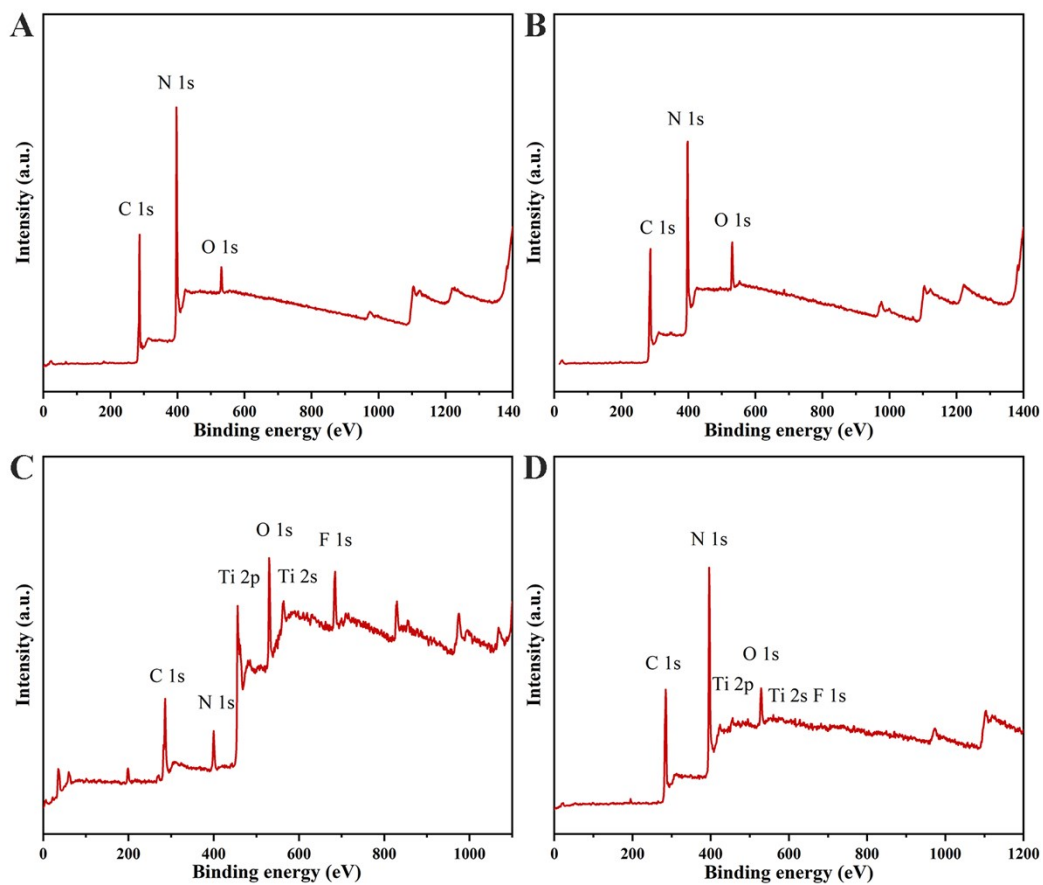

**Fig. S8** XPS survey spectra of (A) bulk  $g\text{-C}_3\text{N}_4$ , (B) CN, (C)  $\text{Ti}_3\text{C}_2$  and (D) CT-CN.



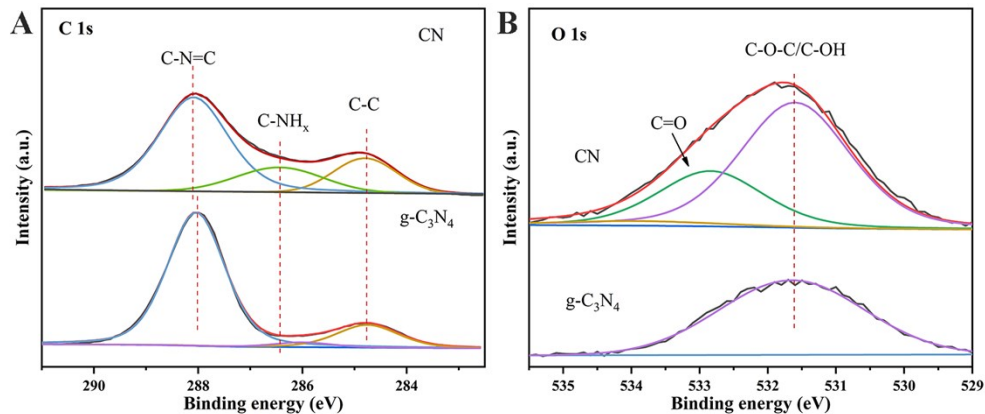

**Fig. S9** (A) C 1s and (B) O 1s XPS spectra of Ti<sub>3</sub>C<sub>2</sub> and CN

As shown in Fig. S9A, the peak of C-N=C for CN is obviously weaker in comparison with g-C<sub>3</sub>N<sub>4</sub>, resulting from the damaged triazine units caused by the introduced N-defects. Meanwhile, a greatly increased intensity of the peak (C-NH<sub>x</sub> on the edges of heptazine units) is observed, implying numerous amino groups are produced on the N-defects. Fig. S9B exhibits O 1s XPS spectra of g-C<sub>3</sub>N<sub>4</sub> and CN. the enhanced C-OH/C-O-C peak and a new C=O peak indicate Oxygen-containing groups are introduced in CN.

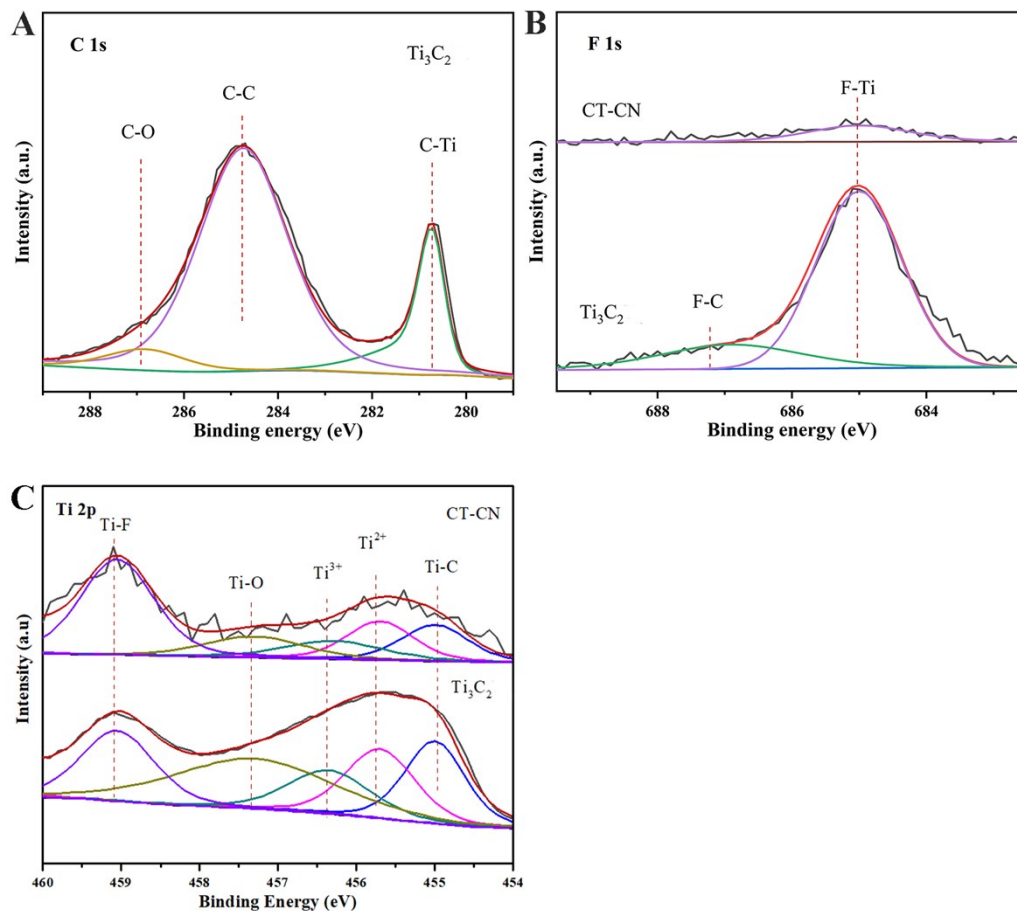

**Fig. S10** (A) C 1s, (B) F 1s and (C) Ti 2p XPS spectra.

The C 1s XPS spectra of Ti<sub>3</sub>C<sub>2</sub> (Fig. S10A) can be deconvoluted into three peaks at 280.7 eV, 284.8 eV and 286.9 eV, corresponding to the C-Ti on the skeleton, graphitic C-C and C-O originated from the selective dissolution of Ti during etching. For F 1s (Fig. S10B), a terminal F-Ti at 685 eV and F-C at 687.2 eV are observed. As shown in Fig. S10C, the Ti 2p XPS spectra are divided into five peaks at 451.7, 452.4, 453.0, 454.0 and 455.8 eV, corresponding to Ti-C on the skeleton, Ti<sup>2+</sup> as well as Ti<sup>3+</sup> on the edge or defect of Ti<sub>3</sub>C<sub>2</sub>, Ti-O and Ti-F on the terminal groups. The CT-CN exhibits the same peak as that of Ti<sub>3</sub>C<sub>2</sub>.

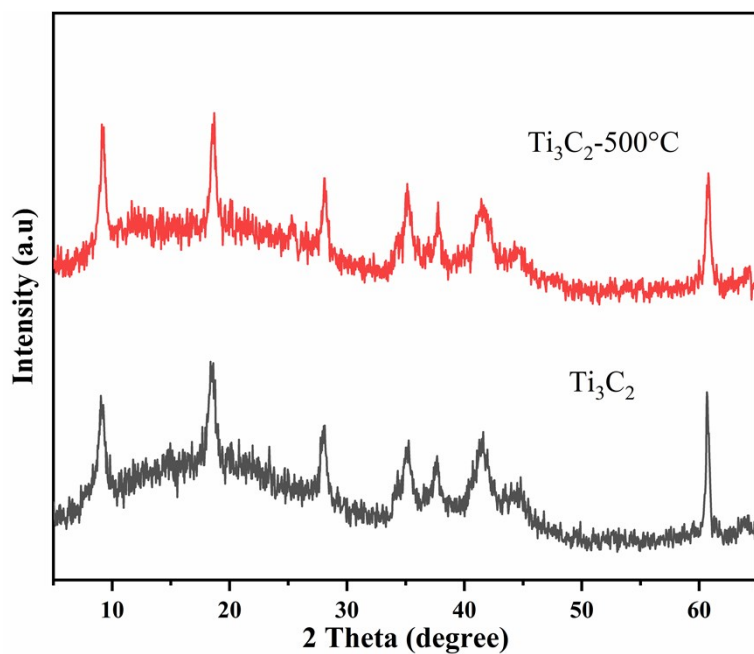

Fig. S11 The XRD patterns of  $\text{Ti}_3\text{C}_2$  and  $\text{Ti}_3\text{C}_2$  after treated in  $300^\circ\text{C}$ .

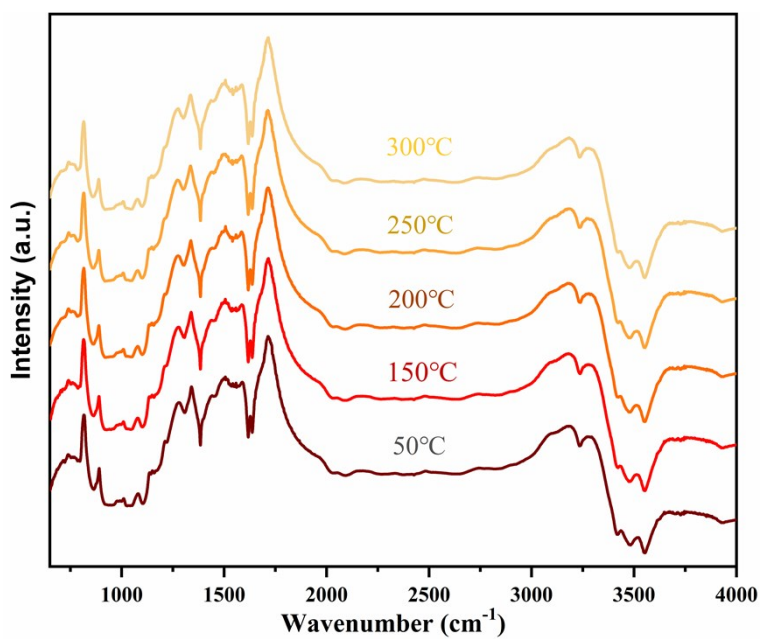

Fig. S12 In situ DRFTIRS spectra of CT-CN treated in an increasing temperature from  $50^\circ\text{C}$  to  $300^\circ\text{C}$

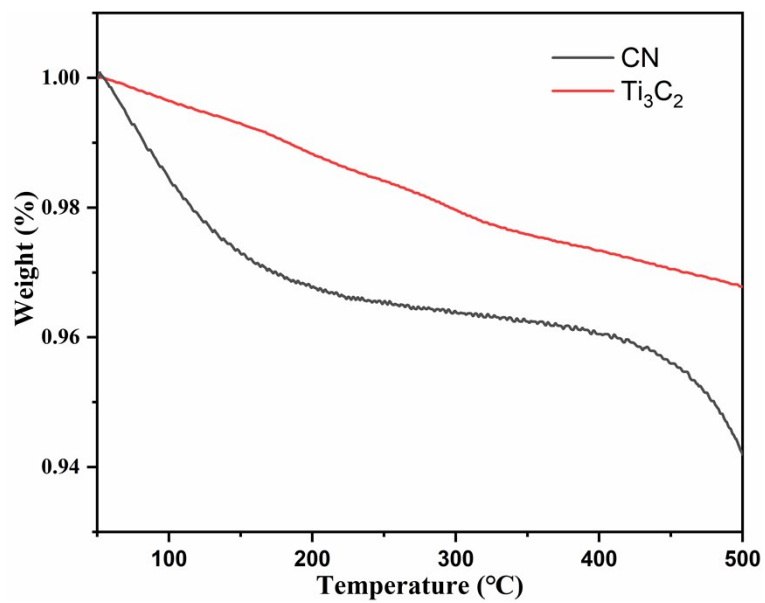

**Fig. S13** The TG analysis of CN and Ti<sub>3</sub>C<sub>2</sub>.

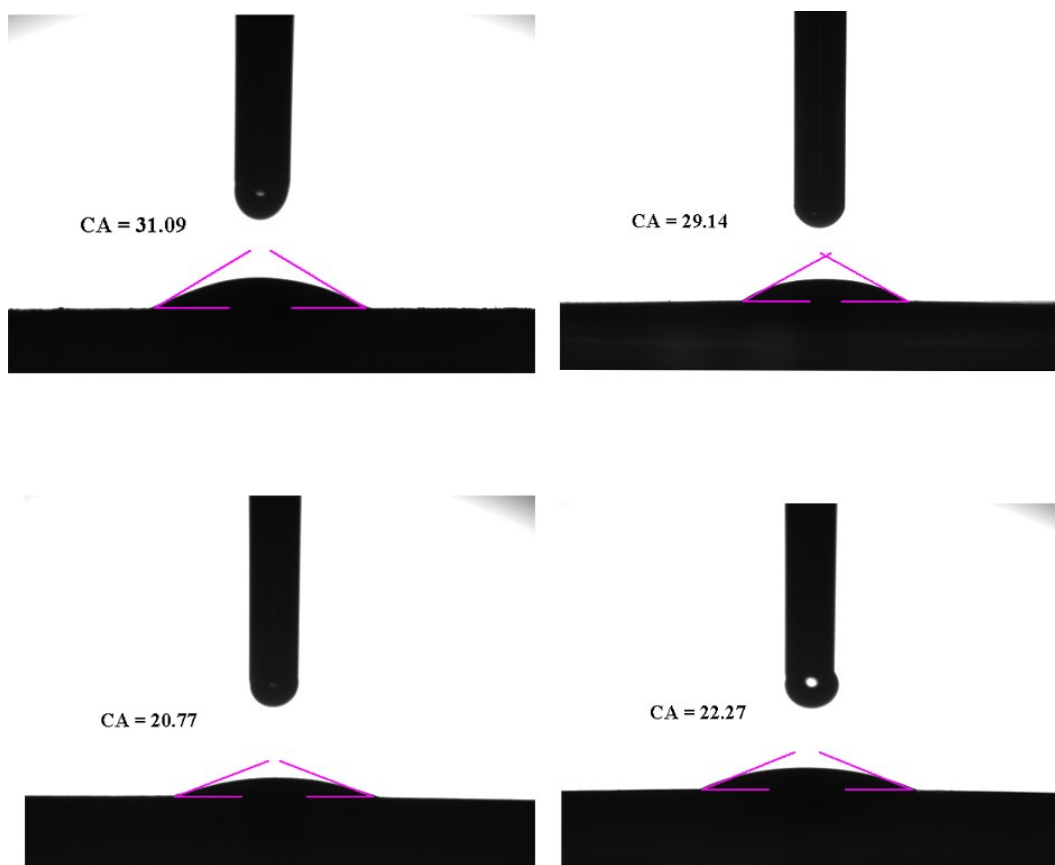

**Fig. S14** The contact Angle tests of bulk  $g\text{-C}_3\text{N}_4$ , CN, CT-CN and CT-CN treated in  $300\text{ }^\circ\text{C}$ ..

As shown in Fig. S11,  $\text{Ti}_3\text{C}_2$  exhibits no change in the XRD patterns after treated in  $300\text{ }^\circ\text{C}$ , indicating a heating treatment in such temperature does not affect the structure of  $\text{Ti}_3\text{C}_2$ . In situ DRFTIRS spectra (Fig. S12) records the chemical structure of CT-CN during the heating treatment process. Obviously, the  $\text{C}_3\text{N}_4$  triazine structure is maintained after a treatment at  $300\text{ }^\circ\text{C}$ . However, the TG (Fig. S13) reveals a continual decline in mass of CN and  $\text{Ti}_3\text{C}_2$  during the heating process. Combined with the results of the XRD and in situ DRFTIRS, it suggests a loss of surface groups in both CN and  $\text{Ti}_3\text{C}_2$ . Fig. S14 shows the contact Angle test result. The groups obtained by the introduction of N-defects and the combination with  $\text{Ti}_3\text{C}_2$  result in the great hydrophilia for CT-CN. After treated in  $300\text{ }^\circ\text{C}$ , a decrease in contact Angle suggests a reduced hydrophilia due to the loss of hydrophilic groups.

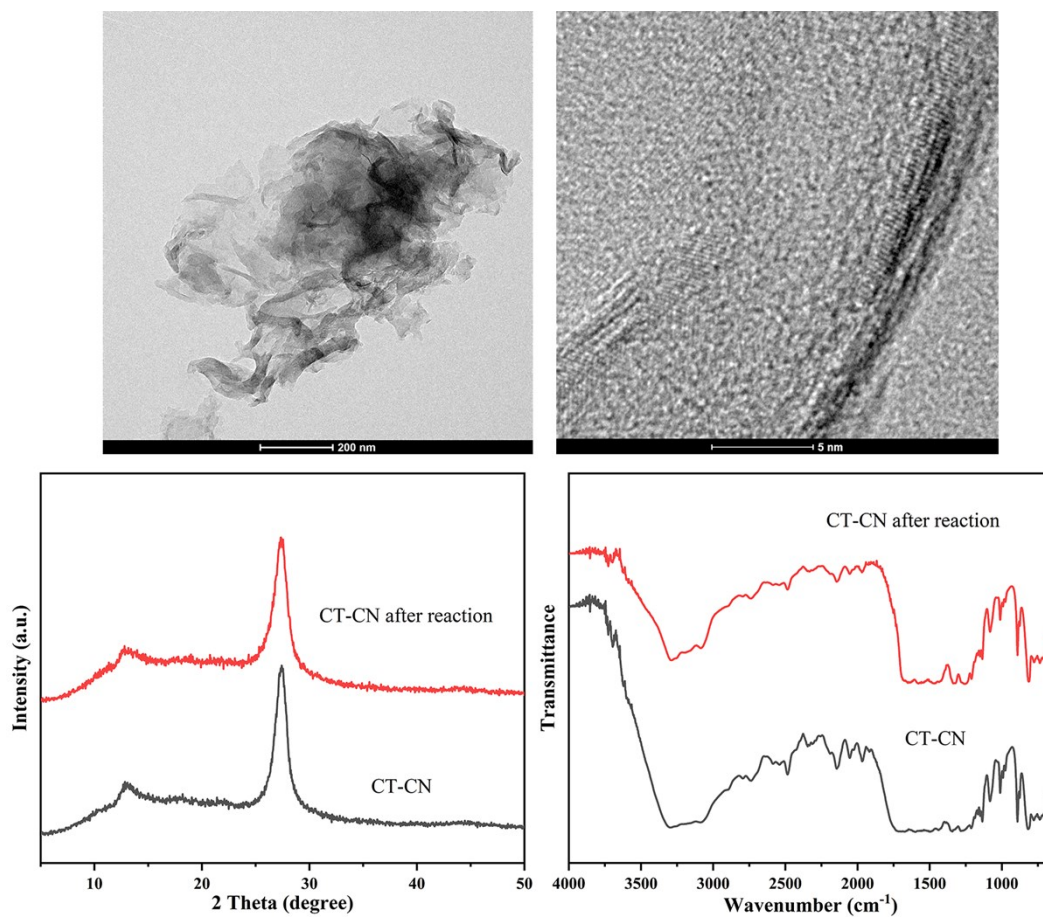

**Fig. S15** (A) TEM and (B) HRTEM images of CT-CN after reaction; (C) XRD patterns and (D) FT-IR spectra of CT-CN before and after reaction.

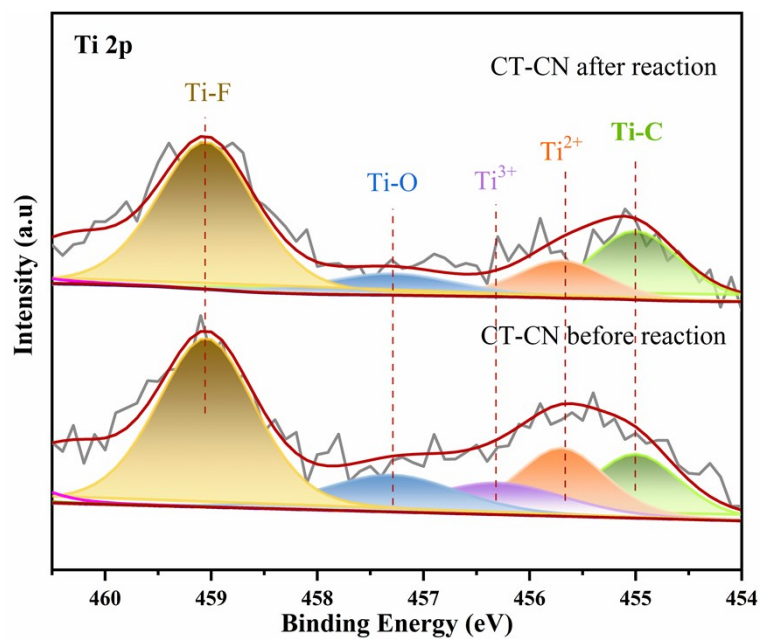

Fig. S16 Ti 2p XPS spectra of CT-CN before reaction and after reaction.

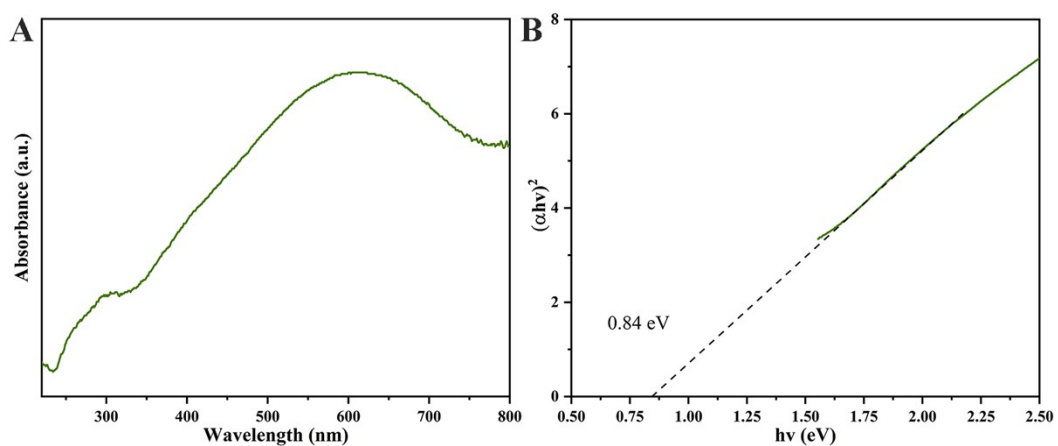

Fig. S17 (A) UV-vis DRS spectrum and (B) plot of transformed Kubelka–Munk function versus photon energy of  $\text{Ti}_3\text{C}_2$ .

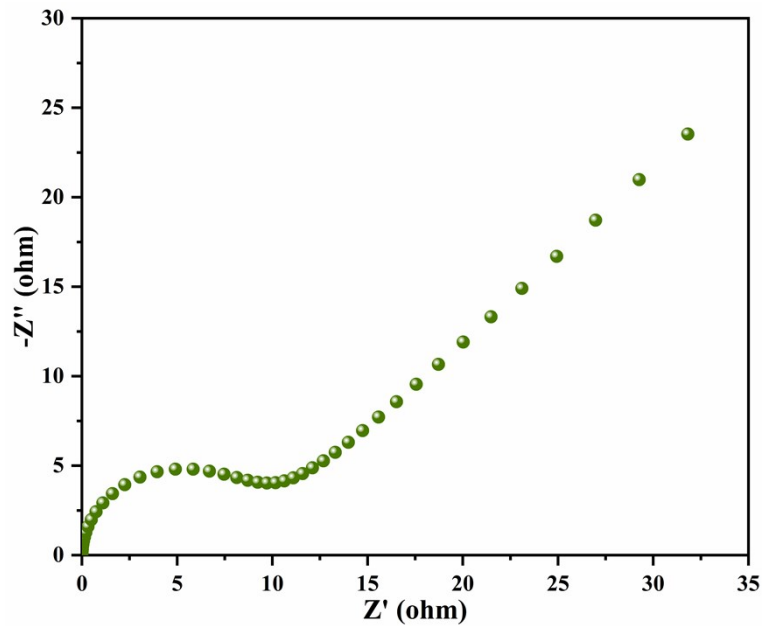

Fig. S18 Electrochemical impedance spectrum of  $\text{Ti}_3\text{C}_2$ .

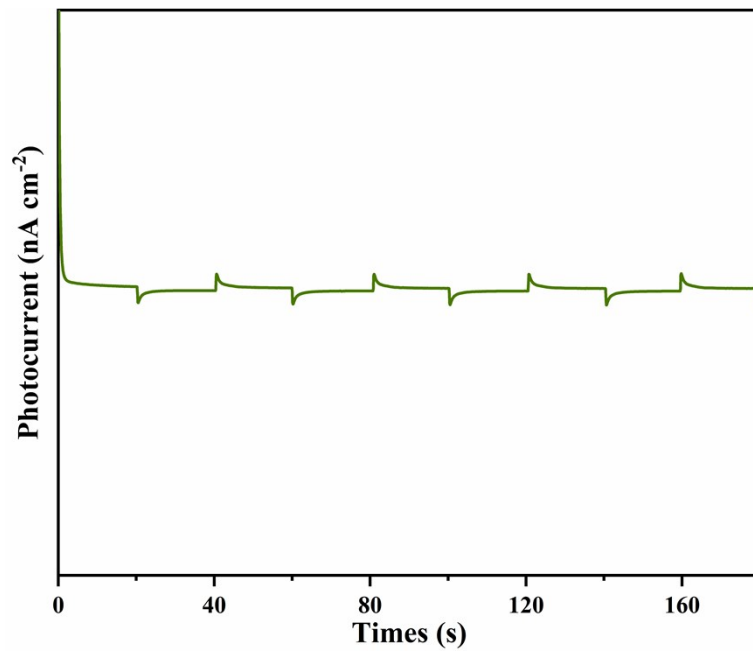

Fig. S19 Transient photocurrent response of  $\text{Ti}_3\text{C}_2$ .



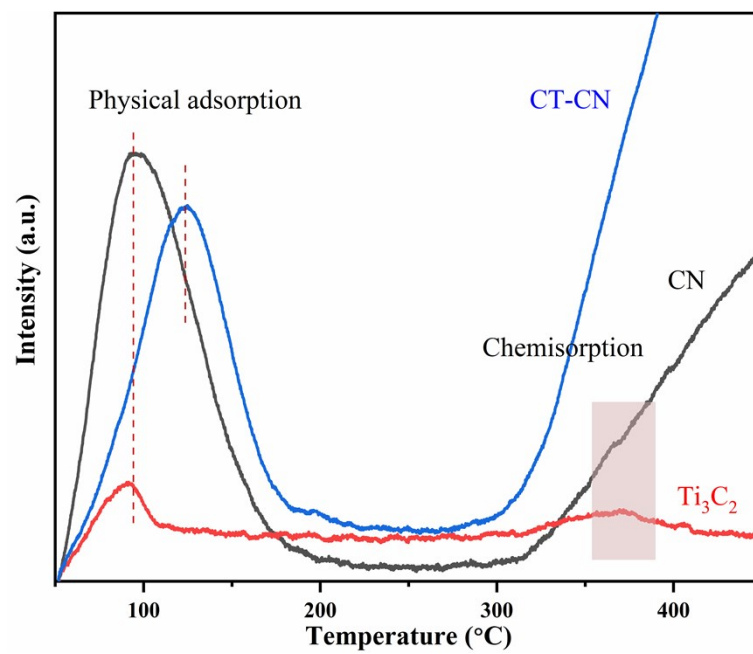

**Fig. S20** N<sub>2</sub>-TPD of CN, Ti<sub>3</sub>C<sub>2</sub> and CT-CN.

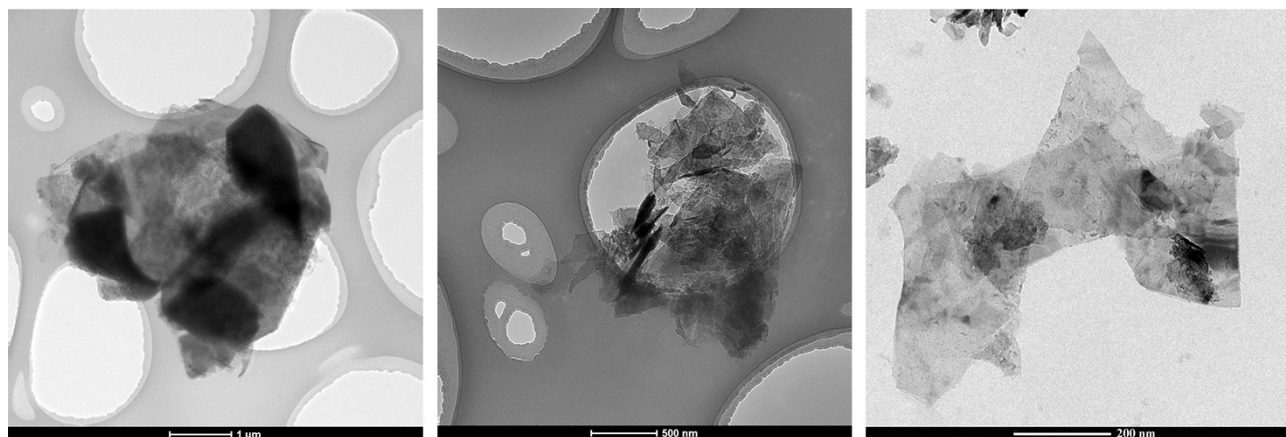

**Fig. S21** TEM images of Ti<sub>3</sub>C<sub>2</sub> centrifuged at the speed of 0 rpm, 5000 rpm and 10000 rpm.

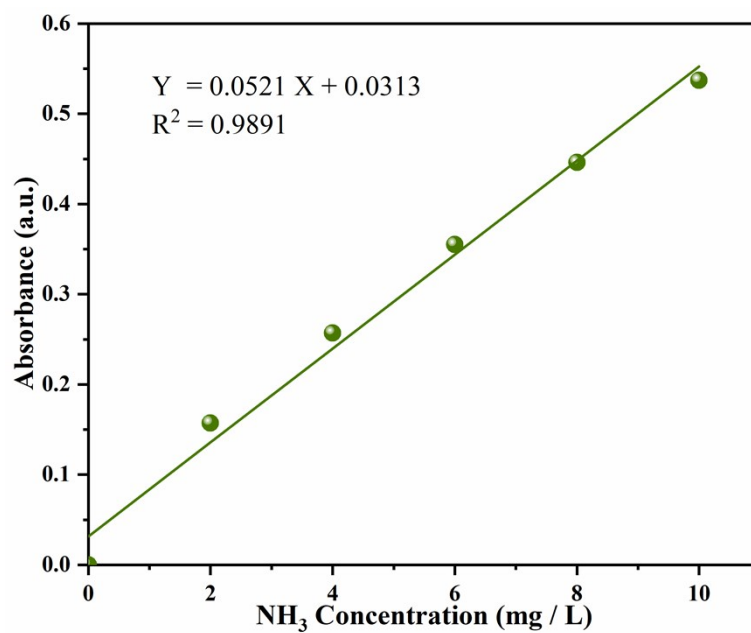

Fig. S22 Ammonia nitrogen standard curve.

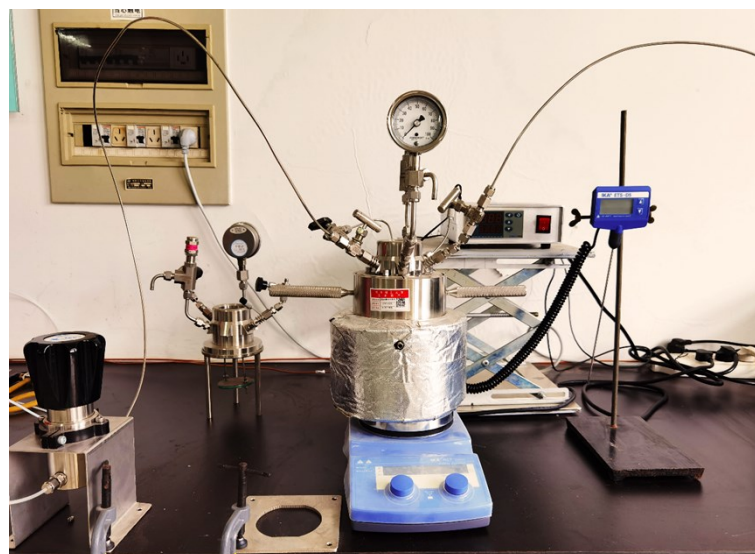

Fig. S23 Photograph of photocatalytic reactor.

**Table S1.** XPS analysis of C, N in g-C<sub>3</sub>N<sub>4</sub> and CN

| Sample                          | C 1s     |                   |                      | N 1s     |                  |                      | C/N   |
|---------------------------------|----------|-------------------|----------------------|----------|------------------|----------------------|-------|
|                                 | Position | Assignment        | C/C <sub>total</sub> | Position | Assignment       | N/N <sub>total</sub> |       |
| g-C <sub>3</sub> N <sub>4</sub> | 284.8    | C-C               | 0.196                | 398.6    | N <sub>2</sub> C | 0.786                | 0.983 |
|                                 | 286.1    | C-NH <sub>x</sub> | 0.087                | 399.6    | N <sub>3</sub> C | 0.163                |       |
|                                 | 287.7    | C=N-C             | 0.717                | 400.9    | NH <sub>x</sub>  | 0.051                |       |
| CN                              | 284.8    | C-C               | 0.167                | 398.6    | N <sub>2</sub> C | 0.621                | 1.069 |
|                                 | 286.4    | C-NH <sub>x</sub> | 0.222                | 399.5    | N <sub>3</sub> C | 0.293                |       |
|                                 | 288.0    | C=N-C             | 0.611                | 400.9    | NH <sub>x</sub>  | 0.087                |       |

**Table S2.** Comparison of different reported photocatalysts for photocatalytic N<sub>2</sub> fixation

| Photocatalyst                                                        | Scavenger                  | Light Source  | NH <sub>3</sub> yield                                  | Ref.      |
|----------------------------------------------------------------------|----------------------------|---------------|--------------------------------------------------------|-----------|
| CT-CN                                                                | methanol                   | 300 W Xe lamp | 5.79 mg h <sup>-1</sup> g <sub>cat</sub> <sup>-1</sup> | This work |
| Li-3D-GCN                                                            | methanol                   | 400–800 nm    | 2.41 mg h <sup>-1</sup> g <sub>cat</sub> <sup>-1</sup> | S-1       |
| Fe-doped g-C <sub>3</sub> N <sub>4</sub>                             | Ethanol                    | 400–800 nm    | 2.55 mg h <sup>-1</sup> g <sub>cat</sub> <sup>-1</sup> | S-2       |
| Ga <sub>2</sub> O <sub>3</sub> -DBD/ g-C <sub>3</sub> N <sub>4</sub> | 0.04 mM CH <sub>3</sub> OH | 500 W Xe lamp | 4.78 mg h <sup>-1</sup> g <sub>cat</sub> <sup>-1</sup> | S-3       |
| Single Cu atom modified g-CN                                         | 20% CH <sub>3</sub> OH     | (420~780 nm)  | 3.16 mg h <sup>-1</sup> g <sub>cat</sub> <sup>-1</sup> | S-4       |
| g-C <sub>3</sub> N <sub>4</sub> /Fe <sub>2</sub> O <sub>3</sub>      | Methanol                   | 300 W Xe lamp | 1.00 mg h <sup>-1</sup> g <sub>cat</sub> <sup>-1</sup> | S-5       |
| TiO <sub>2</sub> @C/ g-C <sub>3</sub> N <sub>4</sub>                 | Methanol                   | λ >420 nm     | 4.25 mg h <sup>-1</sup> g <sub>cat</sub> <sup>-1</sup> | S-6       |
| Fe-EDTA–CNNS                                                         | methanol                   | > 420 nm      | 2.61 mg h <sup>-1</sup> g <sub>cat</sub> <sup>-1</sup> | S-7       |

**Table S3.** XPS analysis of Ti in CT-CN before reaction and CT-CN after reaction.

| Sample                | Binding energy /eV | Assignment       | Ti / Ti <sub>total</sub> |
|-----------------------|--------------------|------------------|--------------------------|
| CT-CN before reaction | 451.7              | Ti-C             | 0.152                    |
|                       | 452.4              | Ti <sup>2+</sup> | 0.163                    |
|                       | 453.0              | Ti <sup>3+</sup> | 0.114                    |
|                       | 454.0              | Ti-O             | 0.132                    |
|                       | 455.8              | Ti-F             | 0.440                    |
| CT-CN after reaction  | 451.7              | Ti-C             | 0.228                    |
|                       | 452.4              | Ti <sup>2+</sup> | 0.126                    |
|                       | 453.0              | Ti <sup>3+</sup> | 0                        |
|                       | 454.0              | Ti-O             | 0.109                    |
|                       | 455.8              | Ti-F             | 0.537                    |

## References

- [S-1] G. Gu, K. Wang, N. Xiong, Z. Li, Z. Fan, S. Hu and X. Zou, *Dalton Trans.*, 2019, **48**, 5083.
- [S-2] S. Hu, X. Chen, Q. Li, F. Li, Z. Fan, H. Wang, Y. Wang, B. Zheng and G. Wu, *Appl. Catal. B.*, 2017, 201, 58.
- [S-3] S. Cao, N. Zhou, F. Gao, H. Chen and F. Jiang, *Appl. Catal. B.*, 2017, **218**, 600.
- [S-4] P. Huang, W. Liu, Z. He, C. Xiao, T. Yao, Y. Zou, C. Wang, Z. Qi, T. Wei.; B. Pan and Sci. *China Chem.*, 2018, **1**, 213.
- [S-5] H. Mou, J. Wang, D. Zhang, D. Yu, W. Chen, D. Wang and T. Mu, *J. Mater. Chem. A.*, 2019, **7**, 5719.
- [S-6] Q. X. Liu, L. H. Ai and J. Jiang, *J. Mater. Chem. A.*, 2018, **6**, 4102.
- [S-7] C. Yao, R. Wang, Z. Wang, H. Lei, X. Dong and C. He, *J. Mater. Chem. A.*, 2019, **7**, 27547.
